# Supplementary material for: A Computerized Frailty Assessment Tool at Points-of-Care: Development of a Standalone Electronic Comprehensive Geriatric Assessment/Frailty Index (eFI-CGA)
Source: PubMed Central journal article supplement (PMC7137764; doi:10.3389/fpubh.2020.00089), 2020-03-31
Supplement: Table_1.pdf [file Table_1.pdf]

**Supplementary Materials #2, Table 1\_v1 (The eFI-CGA Variable Coding Scheme)**

| <b>Variable Name</b> | <b>Field Type</b> | <b>Data Class</b>    | <b>Raw Input Values</b> | <b>Coded Values</b> |
|----------------------|-------------------|----------------------|-------------------------|---------------------|
| Cognition            | Radio button      | Descriptive          | Within Normal Limits    | 0                   |
|                      |                   |                      | CIND / MCI              | 0.5                 |
|                      |                   |                      | Dementia                | 1                   |
| Delirium             | Radio button      | Descriptive          | No                      | 0                   |
|                      |                   |                      | Yes                     | 1                   |
| Mini-Cog             | Dropdown list     | Numerical<br>[0, 5]  | 5                       | 0                   |
|                      |                   |                      | 4                       | 0.33                |
|                      |                   |                      | 2-3                     | 0.66                |
|                      |                   |                      | ≤1                      | 1                   |
| MOCA                 | Dropdown list     | Numerical<br>[0, 30] | ≥25                     | 0                   |
|                      |                   |                      | 20-24                   | 0.33                |
|                      |                   |                      | 11-19                   | 0.66                |
|                      |                   |                      | ≤10                     | 1                   |
| FAST                 | Dropdown list     | Numerical<br>[1, 7]  | 1-2                     | 0                   |
|                      |                   |                      | 3-4                     | 0.5                 |
|                      |                   |                      | ≥5                      | 1                   |
| Low Mood             | Radio button      | Descriptive          | No                      | 0                   |
|                      |                   |                      | Yes                     | 1                   |
| Depression           | Radio button      | Descriptive          | No                      | 0                   |
|                      |                   |                      | Yes                     | 1                   |
| Anxiety              | Radio button      | Descriptive          | No                      | 0                   |
|                      |                   |                      | Yes                     | 1                   |
| Fatigue              | Radio button      | Descriptive          | No                      | 0                   |
|                      |                   |                      | Yes                     | 1                   |
| Hallucination        | Radio button      | Descriptive          | No                      | 0                   |
|                      |                   |                      | Yes                     | 1                   |
| Delusion             | Radio button      | Descriptive          | No                      | 0                   |
|                      |                   |                      | Yes                     | 1                   |
| Other                | Radio button      | Descriptive          | No                      | 0                   |
|                      |                   |                      | Yes                     | 1                   |
| Motivation           | Radio button      | Descriptive          | High                    | 0                   |
|                      |                   |                      | Usual                   | 0.5                 |
|                      |                   |                      | Low                     | 1                   |
| Health Attitude      | Radio button      | Descriptive          | Excellent               | 0                   |
|                      |                   |                      | Good                    | 0.33                |
|                      |                   |                      | Fair                    | 0.66                |
|                      |                   |                      | Poor                    | 1                   |
| Speech               | Radio button      | Descriptive          | Within Normal Limits    | 0                   |
|                      |                   |                      | Impaired                | 1                   |

|                             |               |                   |                      |     |
|-----------------------------|---------------|-------------------|----------------------|-----|
| Hearing                     | Radio button  | Descriptive       | Within Normal Limits | 0   |
|                             |               |                   | Impaired             | 1   |
| Vision                      | Radio button  | Descriptive       | Within Normal Limits | 0   |
|                             |               |                   | Impaired             | 1   |
| Sleep                       | Radio button  | Descriptive       | Within Normal Limits | 0   |
|                             |               |                   | Disrupted            | 1   |
| Daytime Drowsiness          | Radio button  | Descriptive       | Yes                  | 1   |
|                             |               |                   | No                   | 0   |
| Pain                        | Radio button  | Descriptive       | None                 | 0   |
|                             |               |                   | Moderate             | 0.5 |
|                             |               |                   | Extreme              | 1   |
| Control of Life Events      | Radio button  | Descriptive       | Yes                  | 0   |
|                             |               |                   | No                   | 1   |
| Usual Activities            | Radio button  | Descriptive       | No Problem           | 0   |
|                             |               |                   | Some Problem         | 0.5 |
|                             |               |                   | Unable               | 1   |
| Exercise                    | Radio button  | Descriptive       | Frequent             | 0   |
|                             |               |                   | Occasional           | 0.5 |
|                             |               |                   | Not                  | 1   |
| Smoke                       | Radio button  | Descriptive       | Never                | 0   |
|                             |               |                   | Past                 | 0.5 |
|                             |               |                   | Current              | 1   |
| Strength                    | Radio button  | Descriptive       | Within Normal Limits | 0   |
|                             |               |                   | Weak                 | 1   |
| Lower Proximal – Hip Flexor | Radio button  | Descriptive       | No                   | 0   |
|                             |               |                   | Yes                  | 1   |
| Balance                     | Radio button  | Descriptive       | Within Normal Limit  | 0   |
|                             |               |                   | Impaired             | 1   |
| Falls                       | Radio button  | Descriptive       | No                   | 0   |
|                             |               |                   | Yes                  | 1   |
| Falls Number                | Dropdown list | Numerical [0, 99] | 0                    | 0   |
|                             |               |                   | 1                    | 0.5 |
|                             |               |                   | >1                   | 1   |
| Walk Outside                | Radio button  | Descriptive       | Individual           | 0   |
|                             |               |                   | Assistance           | 0.5 |
|                             |               |                   | Can't                | 1   |

|                |               |                      |                     |      |
|----------------|---------------|----------------------|---------------------|------|
| Walking Inside | Radio button  | Descriptive          | Individual          | 0    |
|                |               |                      | Slow                | 0.33 |
|                |               |                      | Assistance          | 0.66 |
|                |               |                      | Dependent           | 1    |
| Transfers      | Radio button  | Descriptive          | Individual          | 0    |
|                |               |                      | Stand by            | 0.33 |
|                |               |                      | Assistance          | 0.66 |
|                |               |                      | Dependent           | 1    |
| Bed            | Radio button  | Descriptive          | Individual          | 0    |
|                |               |                      | Pull                | 0.33 |
|                |               |                      | Assistance          | 0.66 |
|                |               |                      | Dependent           | 1    |
| Aid            | Radio button  | Descriptive          | None                | 0    |
|                |               |                      | Cane                | 0.33 |
|                |               |                      | Walker              | 0.66 |
|                |               |                      | Chair               | 1    |
| FTSTS          | Dropdown List | Numerical<br>[0, 15] | $\leq 9$            | 0    |
|                |               |                      | 10-14               | 0.5  |
|                |               |                      | $\geq 15$           | 1    |
| Weight         | Radio button  | Descriptive          | Good                | 0    |
|                |               |                      | Under               | 0.5  |
|                |               |                      | Over                | 0.5  |
|                |               |                      | Obese               | 1    |
| Appetite       | Radio button  | Descriptive          | Within Normal Limit | 0    |
|                |               |                      | Fair                | 0.5  |
|                |               |                      | Poor                | 1    |
| Bowel          | Radio button  | Descriptive          | Continent           | 0    |
|                |               |                      | Incontinent         | 1    |
| Constipation   | Radio button  | Descriptive          | No                  | 0    |
|                |               |                      | Yes                 | 1    |
| Bladder        | Radio button  | Descriptive          | Continent           | 0    |
|                |               |                      | Incontinent         | 1    |
| Catheter       | Radio button  | Descriptive          | No                  | 0    |
|                |               |                      | Yes                 | 1    |
| Feeding        | Radio button  | Descriptive          | Individual          | 0    |
|                |               |                      | Assistance          | 0.5  |
|                |               |                      | Dependent           | 1    |
| Bathing        | Radio button  | Descriptive          | Individual          | 0    |
|                |               |                      | Assistance          | 0.5  |
|                |               |                      | Dependent           | 1    |
| Dressing       | Radio button  | Descriptive          | Individual          | 0    |
|                |               |                      | Assistance          | 0.5  |
|                |               |                      | Dependent           | 1    |

|                       |               |                   |                              |                                                                              |
|-----------------------|---------------|-------------------|------------------------------|------------------------------------------------------------------------------|
| Toileting             | Radio button  | Descriptive       | Individual                   | 0                                                                            |
|                       |               |                   | Assistance                   | 0.5                                                                          |
|                       |               |                   | Dependent                    | 1                                                                            |
| Cooking               | Radio button  | Descriptive       | Individual                   | 0                                                                            |
|                       |               |                   | Assistance                   | 0.5                                                                          |
|                       |               |                   | Dependent                    | 1                                                                            |
| Cleaning              | Radio button  | Descriptive       | Individual                   | 0                                                                            |
|                       |               |                   | Assistance                   | 0.5                                                                          |
|                       |               |                   | Dependent                    | 1                                                                            |
| Shopping              | Radio button  | Descriptive       | Individual                   | 0                                                                            |
|                       |               |                   | Assistance                   | 0.5                                                                          |
|                       |               |                   | Dependent                    | 1                                                                            |
| Meds                  | Radio button  | Descriptive       | Individual                   | 0                                                                            |
|                       |               |                   | Assistance                   | 0.5                                                                          |
|                       |               |                   | Dependent                    | 1                                                                            |
| Driving               | Radio button  | Descriptive       | Individual                   | 0                                                                            |
|                       |               |                   | Assistance                   | 0.5                                                                          |
|                       |               |                   | Dependent                    | 1                                                                            |
| Banking               | Radio button  | Descriptive       | Individual                   | 0                                                                            |
|                       |               |                   | Assistance                   | 0.5                                                                          |
|                       |               |                   | Dependent                    | 1                                                                            |
| Enough income?        | Radio button  | Descriptive       | Yes                          | 0                                                                            |
|                       |               |                   | No                           | 1                                                                            |
| Socially Engaged      | Radio button  | Descriptive       | Frequent                     | 0                                                                            |
|                       |               |                   | Occasional                   | 0.5                                                                          |
|                       |               |                   | Not                          | 1                                                                            |
| Lives                 | Radio button  | Descriptive       | Spouse                       | 0                                                                            |
|                       |               |                   | Other                        | 0.5                                                                          |
|                       |               |                   | Alone                        | 1                                                                            |
| Number of Problems    | Dropdown list | Numerical [0, 99] | Any integer between 0 and 18 | Count of the total number of problems if $\leq 18$ ; or 18 if it is $> 18$ . |
| Number of Medications | Dropdown list | Numerical [0, 99] | $\leq 4$                     | 0                                                                            |
|                       |               |                   | 5-7                          | 0.5                                                                          |
|                       |               |                   | $\geq 8$                     | 1                                                                            |

**Note:** The default value for all dropdown lists is "Select a value", there is no default value for the rest of the field types, MOCA = Montreal Cognitive Assessment, FAST = Functional Assessment Staging Test, FTST = Five Times Sit to Stand.
